# Supplementary material for: Barley whole exome capture: a tool for genomic research in the genus Hordeum and beyond
Source: PubMed Central journal article supplement — Plant J. 2013 Aug 24;76(3):494–505. doi: 10.1111/tpj.12294 (PMC4241023; doi:10.1111/tpj.12294), 2013-08-24

**a** In-solution capture assay design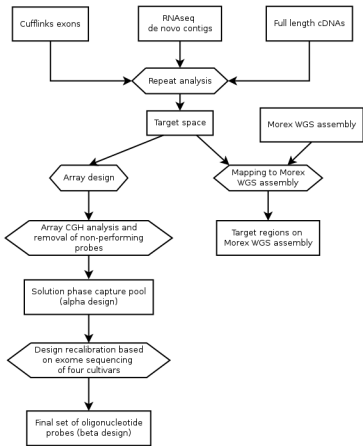**b** Experimental procedures (NimbleGen Plant Sequence Capture)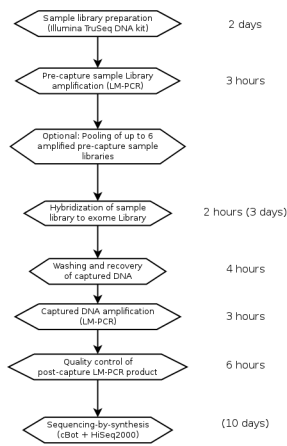**c** Exome sequencing analysis pipeline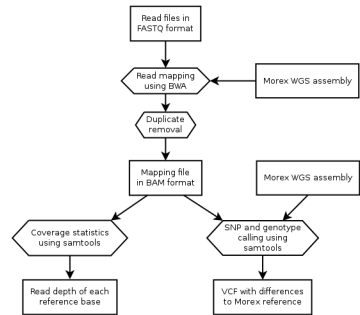

Supplement: tpj0076-0494-SD1.pdf [file tpj0076-0494-SD1.pdf]
