# Supplementary figures and images for: Barley whole exome capture: a tool for genomic research in the genus Hordeum and beyond
Source: PubMed Central journal article supplement — Plant J. 2013 Aug 24;76(3):494–505. doi: 10.1111/tpj.12294 (PMC4241023; doi:10.1111/tpj.12294), 2013-08-24

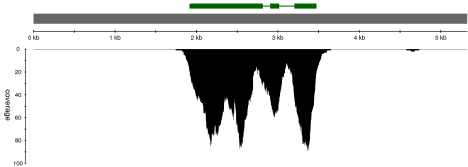

Supplement: tpj0076-0494-SD2.pdf [file tpj0076-0494-SD2.pdf]

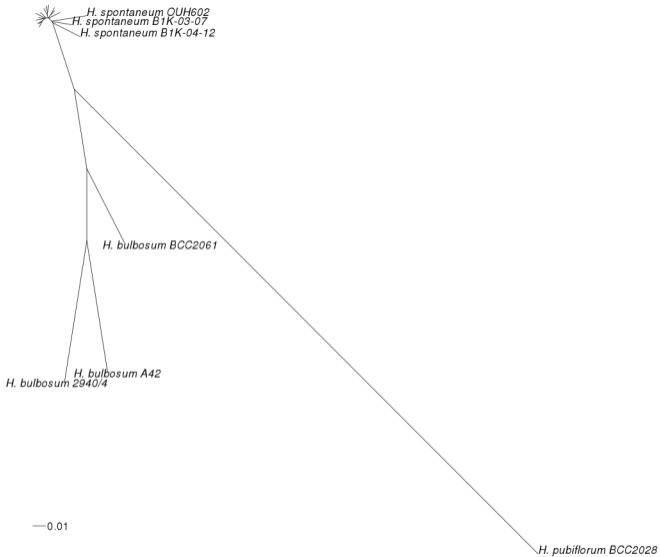

Supplement: tpj0076-0494-SD3.pdf [file tpj0076-0494-SD3.pdf]
